# Supplementary material for: Mitochondrial tRNA methylation in Alzheimer’s disease and progressive supranuclear palsy
Source: BMC Med Genomics. 2020 May 19;13:71. doi: 10.1186/s12920-020-0727-9 (PMC7236490; doi:10.1186/s12920-020-0727-9)
Supplement: Supplementary file 3 — Additional file 3. PANTHER over-representation test results. [file 12920_2020_727_MOESM3_ESM.xlsx]

## Sheet: Biological Process
GO biological process complete	Homo sapiens - REFLIST (20996)	Client Text Box Input (519)	Client Text Box Input (expected)	Client Text Box Input (over/under)	Client Text Box Input (fold Enrichment)	Client Text Box Input (raw P-value)	Client Text Box Input (FDR)
DNA repair (GO:0006281)	516	29	12.76	+	2.27	8.71e-05	0.0355
cellular response to DNA damage stimulus (GO:0006974)	783	43	19.35	+	2.22	2.35e-06	0.00187
DNA metabolic process (GO:0006259)	752	38	18.59	+	2.04	7.14e-05	0.0315
oxidation-reduction process (GO:0055114)	964	48	23.83	+	2.01	7.95e-06	0.0055
chromosome organization (GO:0051276)	1055	48	26.08	+	1.84	7.43e-05	0.0319
organonitrogen compound biosynthetic process (GO:1901566)	1416	62	35	+	1.77	2.06e-05	0.0109
cellular nitrogen compound biosynthetic process (GO:0044271)	1658	71	40.98	+	1.73	8.83e-06	0.00585
nucleobase-containing compound metabolic process (GO:0006139)	2804	119	69.31	+	1.72	5.51e-09	1.1e-05
cellular aromatic compound metabolic process (GO:0006725)	3027	127	74.82	+	1.7	2.5e-09	5.67e-06
cellular nitrogen compound metabolic process (GO:0034641)	3454	144	85.38	+	1.69	1.85e-10	5.9e-07
cellular response to stress (GO:0033554)	1729	72	42.74	+	1.68	1.9e-05	0.0108
heterocycle metabolic process (GO:0046483)	2983	124	73.74	+	1.68	6.68e-09	1.18e-05
nucleic acid metabolic process (GO:0090304)	2289	95	56.58	+	1.68	8.35e-07	0.00083
small molecule metabolic process (GO:0044281)	1719	70	42.49	+	1.65	5.22e-05	0.0244
cellular biosynthetic process (GO:0044249)	2773	112	68.55	+	1.63	2.14e-07	0.000283
organic substance biosynthetic process (GO:1901576)	2878	115	71.14	+	1.62	2.35e-07	0.000267
biosynthetic process (GO:0009058)	2954	117	73.02	+	1.6	3.08e-07	0.000326
organic cyclic compound metabolic process (GO:1901360)	3261	129	80.61	+	1.6	6.35e-08	0.000101
gene expression (GO:0010467)	2016	79	49.83	+	1.59	6.4e-05	0.0291
organelle organization (GO:0006996)	3418	123	84.49	+	1.46	1.91e-05	0.0105
cellular metabolic process (GO:0044237)	7671	274	189.62	+	1.44	1.1e-13	1.75e-09
nitrogen compound metabolic process (GO:0006807)	7023	250	173.6	+	1.44	9.44e-12	5.01e-08
organonitrogen compound metabolic process (GO:1901564)	5331	186	131.78	+	1.41	1.88e-07	0.000272
cellular protein metabolic process (GO:0044267)	3713	128	91.78	+	1.39	7.65e-05	0.032
cellular macromolecule metabolic process (GO:0044260)	5083	175	125.65	+	1.39	1.41e-06	0.00124
organic substance metabolic process (GO:0071704)	7874	271	194.64	+	1.39	2.24e-11	8.92e-08
metabolic process (GO:0008152)	8428	290	208.33	+	1.39	1.12e-12	8.94e-09
primary metabolic process (GO:0044238)	7501	257	185.42	+	1.39	2.43e-10	6.45e-07
macromolecule metabolic process (GO:0043170)	6193	209	153.08	+	1.37	2.34e-07	0.000286
locomotion (GO:0040011)	1304	11	32.23	-	0.34	2.42e-05	0.0124
G protein-coupled receptor signaling pathway (GO:0007186)	1315	9	32.51	-	0.28	1.74e-06	0.00145
localization of cell (GO:0051674)	1061	7	26.23	-	0.27	1.37e-05	0.0084
cell motility (GO:0048870)	1061	7	26.23	-	0.27	1.37e-05	0.00809
cell migration (GO:0016477)	949	6	23.46	-	0.26	3.27e-05	0.0163
detection of stimulus (GO:0051606)	693	1	17.13	-	0.06	9.98e-07	0.000934
detection of chemical stimulus involved in sensory perception of smell (GO:0050911)	433	0	10.7	-	< 0.01	4.44e-05	0.0214
detection of chemical stimulus involved in sensory perception (GO:0050907)	482	0	11.91	-	< 0.01	1.37e-05	0.00873
detection of stimulus involved in sensory perception (GO:0050906)	543	0	13.42	-	< 0.01	2.77e-06	0.0021
detection of chemical stimulus (GO:0009593)	519	0	12.83	-	< 0.01	6.58e-06	0.00475

## Sheet: Molecular Function
GO molecular function complete	Homo sapiens - REFLIST (20996)	Client Text Box Input (519)	Client Text Box Input (expected)	Client Text Box Input (over/under)	Client Text Box Input (fold Enrichment)	Client Text Box Input (raw P-value)	Client Text Box Input (FDR)
catalytic activity, acting on DNA (GO:0140097)	221	17	5.46	+	3.11	7.16e-05	0.0187
chromatin binding (GO:0003682)	555	32	13.72	+	2.33	2.52e-05	0.00911
RNA binding (GO:0003723)	1679	79	41.5	+	1.9	6.19e-08	4.14e-05
kinase activity (GO:0016301)	808	38	19.97	+	1.9	0.000226	0.0462
transferase activity, transferring phosphorus-containing groups (GO:0016772)	991	44	24.5	+	1.8	0.000254	0.0497
ATP binding (GO:0005524)	1508	62	37.28	+	1.66	0.000151	0.0321
adenyl ribonucleotide binding (GO:0032559)	1567	64	38.73	+	1.65	0.000104	0.0258
adenyl nucleotide binding (GO:0030554)	1578	64	39.01	+	1.64	0.000148	0.033
nucleotide binding (GO:0000166)	2180	85	53.89	+	1.58	3.38e-05	0.0106
nucleoside phosphate binding (GO:1901265)	2181	85	53.91	+	1.58	3.4e-05	0.00998
nucleic acid binding (GO:0003676)	4144	154	102.44	+	1.5	1.08e-07	5.63e-05
heterocyclic compound binding (GO:1901363)	6091	220	150.56	+	1.46	1.68e-10	7.86e-07
organic cyclic compound binding (GO:0097159)	6178	220	152.71	+	1.44	7.04e-10	1.65e-06
catalytic activity (GO:0003824)	5881	203	145.37	+	1.4	8.52e-08	5e-05
ion binding (GO:0043167)	6337	198	156.64	+	1.26	0.000131	0.0308
protein binding (GO:0005515)	12106	347	299.25	+	1.16	2.72e-05	0.00912
binding (GO:0005488)	15320	429	378.69	+	1.13	3.59e-07	0.000153
molecular_function (GO:0003674)	17722	481	438.07	+	1.1	2.42e-08	2.27e-05
Unclassified (UNCLASSIFIED)	3274	38	80.93	-	0.47	2.42e-08	1.89e-05
transmembrane signaling receptor activity (GO:0004888)	1308	7	32.33	-	0.22	1.25e-07	5.84e-05
molecular transducer activity (GO:0060089)	1525	8	37.7	-	0.21	6.41e-09	7.52e-06
signaling receptor activity (GO:0038023)	1516	7	37.47	-	0.19	1.18e-09	1.85e-06
G protein-coupled receptor activity (GO:0004930)	880	3	21.75	-	0.14	1.49e-06	0.000582
olfactory receptor activity (GO:0004984)	433	0	10.7	-	< 0.01	4.44e-05	0.0122

## Sheet: Cellular Component
GO cellular component complete	Homo sapiens - REFLIST (20996)	Client Text Box Input (519)	Client Text Box Input (expected)	Client Text Box Input (over/under)	Client Text Box Input (fold Enrichment)	Client Text Box Input (raw P-value)	Client Text Box Input (FDR)
nuclear speck (GO:0016607)	405	28	10.01	+	2.8	2.57e-06	0.000272
mitochondrial protein complex (GO:0098798)	267	18	6.6	+	2.73	0.00021	0.0169
mitochondrial inner membrane (GO:0005743)	480	30	11.87	+	2.53	1.09e-05	0.00104
mitochondrial envelope (GO:0005740)	754	45	18.64	+	2.41	1.84e-07	2.64e-05
organelle inner membrane (GO:0019866)	542	32	13.4	+	2.39	1.19e-05	0.00108
mitochondrial membrane (GO:0031966)	712	42	17.6	+	2.39	6.26e-07	7.85e-05
envelope (GO:0031975)	1206	63	29.81	+	2.11	4.76e-08	7.96e-06
organelle envelope (GO:0031967)	1206	63	29.81	+	2.11	4.76e-08	7.35e-06
nuclear body (GO:0016604)	799	39	19.75	+	1.97	0.000117	0.00978
mitochondrion (GO:0005739)	1622	73	40.09	+	1.82	1.3e-06	0.000154
nucleoplasm (GO:0005654)	3990	169	98.63	+	1.71	4.77e-13	2.4e-10
nuclear lumen (GO:0031981)	4758	182	117.61	+	1.55	2.4e-10	4.38e-08
organelle lumen (GO:0043233)	5878	216	145.3	+	1.49	5.48e-11	1.57e-08
intracellular organelle lumen (GO:0070013)	5878	216	145.3	+	1.49	5.48e-11	1.37e-08
membrane-enclosed lumen (GO:0031974)	5878	216	145.3	+	1.49	5.48e-11	1.22e-08
nucleus (GO:0005634)	7530	260	186.13	+	1.4	7.22e-11	1.45e-08
intracellular membrane-bounded organelle (GO:0043231)	10912	362	269.73	+	1.34	4.4e-16	8.84e-13
cytosol (GO:0005829)	5211	170	128.81	+	1.32	6.03e-05	0.00527
intracellular organelle (GO:0043229)	12721	396	314.45	+	1.26	9.82e-14	9.86e-11
membrane-bounded organelle (GO:0043227)	12629	393	312.18	+	1.26	1.62e-13	1.09e-10
organelle (GO:0043226)	13759	415	340.11	+	1.22	1.01e-12	3.38e-10
cytoplasm (GO:0005737)	11491	343	284.05	+	1.21	2.52e-07	3.38e-05
intracellular (GO:0005622)	14526	432	359.07	+	1.2	5.72e-13	2.3e-10
intrinsic component of membrane (GO:0031224)	5941	110	146.86	-	0.75	0.000302	0.0233
plasma membrane (GO:0005886)	5774	96	142.73	-	0.67	3.2e-06	0.000322
cell periphery (GO:0071944)	5900	98	145.84	-	0.67	1.82e-06	0.000203
